# Supplementary material for: Genome-wide association analysis of coffee drinking suggests association with CYP1A1/CYP1A2 and NRCAM
Source: Springer Nature journal article supplement (doi:10.1038/mp.2011.101), 2011-08-30

**Supplemental Material for**  
**“Genome-wide association analysis of coffee drinking suggests association to CYP1A1/CYP1A2 and NRCAM”**

Najaf Amin<sup>1\*</sup> MSc, Enda Byrne<sup>2\*</sup> MSc, Julie Johnson<sup>2</sup> PhD, Georgia Chenevix-Trench<sup>2</sup> PhD, Stefan Walter<sup>3,4</sup> MSc, Ilja M. Nolte<sup>5</sup> MSc, kConFab Investigators<sup>6</sup>, Jacqueline M. Vink<sup>7</sup> PhD, Rajesh Rawal<sup>8</sup> MSc, Massimo Mangino<sup>9</sup> MSc, Alexander Teumer<sup>10</sup> MSc, Joost C. Keers<sup>11</sup> MSc, Germaine Verwoert<sup>3</sup> MSc, Sebastian Baumeister<sup>12</sup> MSc, Reiner Biffar<sup>13</sup> MSc, Astrid Petersmann<sup>14</sup> MSc, Norbert Dahmen<sup>15</sup> MSc, Angela Doering<sup>8</sup> MSc, Aaron J. Isaacs<sup>1</sup> PhD, Linda Broer<sup>1</sup> MSc, Naomi R. Wray<sup>2</sup> PhD, Grant W. Montgomery<sup>2</sup> PhD, Daniel Levy<sup>16,17</sup> PhD, Bruce M. Psaty<sup>18,19</sup> PhD, Vilmundur Gudnason<sup>20,21</sup> PhD, Aravinda Chakravarti<sup>22,23</sup> PhD, Patrick Sulem<sup>24</sup> PhD, Daniel F. Gudbjartsson<sup>24</sup> PhD, Lambertus A. Kiemeny<sup>25,26,27</sup> PhD, Unnur Thorsteinsdottir<sup>24,28</sup> PhD, Kari Stefansson<sup>24,28</sup> PhD, Frank J.A. van Rooij<sup>4</sup> PhD, Yurii S. Aulchenko<sup>1</sup> PhD, Jouke J. Hottenga<sup>7</sup> PhD, Fernando R. Rivadeneira<sup>29</sup> PhD, Albert Hofman<sup>3</sup> PhD, Andre G. Uitterlinden<sup>29</sup> PhD, Chris J. Hammond<sup>30</sup> PhD, So-Youn Shin<sup>26</sup> PhD, Arfan Ikram<sup>3</sup> PhD, Jacqueline C.M. Witteman<sup>3</sup> PhD, A. Cecile J.W. Janssens<sup>3</sup> PhD, Harold Snieder<sup>5,11</sup> PhD, Henning Tiemier<sup>3,31</sup> PhD, Bruce H. R. Wolfenbuttel<sup>11,32</sup> PhD, Ben A. Oostra<sup>1,33</sup> PhD, Andrew C. Heath<sup>34</sup> PhD, Erich Wichmann<sup>8,35</sup> PhD, Tim D. Spector<sup>9</sup> PhD, Hans J. Grabe<sup>36</sup> PhD, Dorret I. Boomsma<sup>7</sup> PhD, Nicholas G. Martin<sup>2\*</sup> PhD, Cornelia M. van Duijn<sup>1,37\*†</sup> PhD

- 1 Unit of Genetic Epidemiology, Department of Epidemiology, Erasmus University Medical Center, the Netherlands
- 2 Queensland Institute of Medical Research, Brisbane, Australia
- 3 Department of Epidemiology, Erasmus University Medical Center, the Netherlands
- 4 Department of Public Health, Erasmus University Medical Center, the Netherlands
- 5 Unit of Genetic Epidemiology & Bioinformatics, Department of Epidemiology University Medical Center Groningen, University of Groningen, The Netherlands
- 6 Peter MacCallum Cancer Institute, Melbourne, Australia
- 7 Department of Biological Psychology, VU University Amsterdam, Amsterdam, the Netherlands
- 8 Institute of Epidemiology, Helmholtz Zentrum München, Neuherberg, Germany
- 9 Department of Twin Research and Genetic Epidemiology, St. Thomas' Hospital Campus, King's College London, London, UK
- 10 Interfaculty Institute for Genetics and Functional Genomics, University of Greifswald, Greifswald, Germany
- 11 LifeLines Cohort Study & Biobank, University Medical Center Groningen, University of Groningen, the Netherlands
- 12 Institute for Community Medicine, University of Greifswald, Germany
- 13 Department of Prosthodontics, Gerodontology and Dental Materials, Center of Oral Health, University of Greifswald, Germany
- 14 Institute of Clinical Chemistry and Laboratory Medicine, University of Greifswald, Germany
- 15 Department of Psychiatry, University of Mainz, Mainz, Germany

- 16 National Heart, Lung, and Blood Institute's Framingham Heart Study, Framingham, Massachusetts, USA
- 17 Center for Population Studies, NHLBI, Bethesda, Maryland, USA
- 18 Cardiovascular Health Research Unit, Departments of Medicine, Epidemiology, and Health Services, University of Washington, Seattle, WA, USA
- 19 Group Health Research Institute, Group Health Cooperative, Seattle, WA, USA
- 20 Icelandic Heart Association, Kopavogur, Iceland
- 21 University of Iceland, Reykjavik, Iceland
- 22 McKusick-Nathans Institute of Genetic Medicine, Johns Hopkins University, Baltimore, Maryland, USA
- 23 Department of Epidemiology and Medicine, Johns Hopkins University, Baltimore, Maryland, USA
- 24 deCODE Genetics, Reykjavik, Iceland
- 25 Department of Urology, Radboud University Nijmegen Medical Centre, Nijmegen, The Netherlands
- 26 Department of Endocrinology, Radboud University Nijmegen Medical Centre, Nijmegen, The Netherlands
- 27 Comprehensive Cancer Center East, 6501 BG Nijmegen, The Netherlands
- 28 Faculty of Medicine, University of Iceland, 101 Reykjavik, Iceland
- 29 Department of internal medicine, Erasmus University Medical Center, Rotterdam, the Netherlands
- 30 Human Genetics, Wellcome Trust Sanger Institute, Genome Campus, Hinxton, UK
- 31 Department of Child and Adolescent Psychiatry, Erasmus University Medical Center, Rotterdam, The Netherlands
- 32 Department of Endocrinology, University Medical Center Groningen, University of Groningen, the Netherlands
- 33 Department of Clinical Genetics, Erasmus University Medical Center, Rotterdam, the Netherlands
- 34 Department of Psychiatry, Washington University, St Louis, USA
- 35 Institute of Medical Informatics, Biometry and Epidemiology, Chair of Epidemiology, Ludwig-Maximilians-Universität, Munich, Germany
- 36 Department of Psychiatry and Psychotherapy, University of Greifswald, Stralsund, Germany
- 37 Centre of Medical Systems Biology, Netherlands Consortium on Healthy Aging and National Genomics Initiative

\* Authors contributed equally

† Correspondence to: Cornelia M. van Duijn, Department of Epidemiology, Erasmus Medical Center Rotterdam, Dr. Molewaterplein 50, 3015 GE, Rotterdam, The Netherlands, E-mail: [c.vanduijn@erasmusmc.nl](mailto:c.vanduijn@erasmusmc.nl), Tel: +31 10 7043394, Fax: +31 10 7044675

Supplementary Table 1. Genotyping and Imputation information of all cohorts

| Study sample | Origin     | Sample type      | Sample size (%women) | Genotyping Platform                         | Quality control of genotyped SNPs |               |                  |      | Genetic Imputations software used | Build | Analysis software used | Total # of SNPs used for imputation | $\lambda$ |
|--------------|------------|------------------|----------------------|---------------------------------------------|-----------------------------------|---------------|------------------|------|-----------------------------------|-------|------------------------|-------------------------------------|-----------|
|              |            |                  |                      |                                             | HWE p-value                       | SNP call rate | Sample call rate | MAF  |                                   |       |                        |                                     |           |
| ERF          | Dutch      | Family based     | 1814(54)             | Illumina 6K, 318K, 370K, Affymetix 250K     | $10^{-6}$                         | 95%           | 95%              | 0.01 | MACH                              | 36    | ProbABEL               | up to 487573                        | 1.01      |
| KORA         | German     | Population based | 1814(51)             | Affymetrix 1000K                            | $10^{-5}$                         | 95%           | 95%              | 0.01 | IMPUTE                            | 36    | SNPTEST                | 688765                              | 0.99      |
| NTR1         | Dutch      | Population based | 732(71)              | Perlegen 600K                               | -                                 | 95%           | 95%              | 0.01 | IMPUTE                            | 36    | SNPTEST                | 435291                              | 1.01      |
| NTR2         | Dutch      | Population based | 355(63)              | Illumina 660K                               | $10^{-5}$                         | 95%           | 95%              | 0.01 | IMPUTE                            | 36    | SNPTEST                | 515781                              | 1.01      |
| RS-I         | Dutch      | Population based | 4190(55)             | Illumina550K                                | -                                 | 90%           | 97.5%            | -    | MACH                              | 36    | ProbABEL               | 491875                              | 1.02      |
| RS-II        | Dutch      | Population based | 1895(54)             | Illumina550K                                | -                                 | 90%           | 97.5%            | -    | MACH                              | 36    | ProbABEL               | -                                   | 1.02      |
| SHIP         | German     | Population based | 2125 (77.4)          | Affymetrix SNP 6.0                          | NA                                | NA            | 92%              | NA   | IMPUTE                            | 36    | QUICKTEST              | 869224                              | 1.03      |
| TwinsUKI     | UK         | Twins            | 1092 (99.73)         | Illumina 317K                               | $10^{-6}$                         | 95%           | 98%              | 0.01 | IMPUTE                            | 36    | GenABEL                | 309197                              | 1.00      |
| TwinsUKII    | UK         | Twins            | 1919 (87.95)         | Illumina 660K                               | $10^{-6}$                         | 95%           | 98%              | 0.01 | IMPUTE                            | 36    | GenABEL                | 582591                              | 1.00      |
| QIMR         | Australian | Twins            | 2240 (74.1)          | Illumina 317K, Illumina 370K, Illumina 610K | $10^{-5}$                         | 95%           | 98%              | 0.01 | MACH                              | 36    | ProbABEL               | 271091                              | 1.00      |
| LifeLines    | Dutch      | Population Based | 7929(57)             | Illumina CytoSNP12v2                        | $10^{-5}$                         | 95%           | 98%              | 0.01 | BEAGLE v3.1.0                     | 36    | PLINK                  | 257581                              | 1.02      |

**Supplementary table 2: Descriptive statistics of all cohorts**

| Population | sample | Average cups of coffee/day(sd) | Average age (sd) |
|------------|--------|--------------------------------|------------------|
| ERF        | Total  | 5.47(3.95)                     | 48.62(14.49)     |
|            | Male   | 5.88(4.39)                     | 49.37(14.48)     |
|            | Female | 5.13(3.49)                     | 48.04(14.48)     |
| KORA       | Total  | 3.34 (2.95)                    | 53.91 (8.86)     |
|            | Male   | 3.44 (3.22)                    | 54.22 (8.92)     |
|            | Female | 3.26 (2.66)                    | 53.62 (8.79)     |
| NTR1       | Total  | 2.79(2.96)                     | 33.16(11.71)     |
|            | Male   | 4.17(3.33)                     | 33.51(12.41)     |
|            | Female | 2.23(2.59)                     | 33.02(11.42)     |
| NTR2       | Total  | 2.98(3.14)                     | 33.53(12.23)     |
|            | Male   | 4.33(3.71)                     | 33.37(11.49)     |
|            | Female | 2.20(2.45)                     | 33.63(12.66)     |
| RS-I       | Total  | 3.85 (1.91)                    | 70.21 (9.65)     |
|            | Male   | 4.16 (2.09)                    | 68.57 (8.59)     |
|            | Female | 3.63 (1.75)                    | 71.26 (10.12)    |
| RS-II      | Total  | 4.36 (2.64)                    | 65.98(10.55)     |
|            | Male   | 4.76(2.72)                     | 64.74(9.49)      |
|            | Female | 4.03(2.52)                     | 66.83(11.14)     |
| SHIP       | Total  | 2.67 (1.95)                    | 53.45 (15.35)    |
|            | Male   | 2.79 (2.10)                    | 59.77 (12.52)    |
|            | Female | 2.63 (1.91)                    | 51.60 (15.61)    |
| TwinsUKI   | Total  | 1.72 (2.51)                    | 54 (11.32)       |
|            | Male   | 2 (1.73)                       | 34.97 (10.1)     |
|            | Female | 1.72 (2.51)                    | 54.05 (11.29)    |
| TwinsUKII  | Total  | 1.61 (2.12)                    | 54.2 (12.68)     |
|            | Male   | 1.74 (2)                       | 54.55 (13.04)    |
|            | Female | 1.59 (2.14)                    | 54.15 (12.63)    |
| QIMR       | Total  | 2.82(2.40)                     | 31.46(11.14)     |
|            | Male   | 2.62 (2.33)                    | 28.09 (7.94)     |
|            | Female | 2.89 (2.42)                    | 32.66 (11.55)    |
| LifeLines  | Total  | 4.01(2.40)                     | 47.48(10.82)     |
|            | Male   | 4.67(2.47)                     | 47.69(10.91)     |
|            | Female | 3.52(2.21)                     | 47.33(10.76)     |

**Supplementary Table 3.** Heterogeneity analysis and results of random effects model

| Marker<br>Name | Allele1 | Allele2 | chr | position  | gene          | Discovery<br>( <i>N</i> = 18,176) |                |                              | Replication<br>( <i>N</i> = 7,929) |                |                             | Het<br>value | Meta-analysis<br>(Discovery + replication)<br>Random effect |                |                             |
|----------------|---------|---------|-----|-----------|---------------|-----------------------------------|----------------|------------------------------|------------------------------------|----------------|-----------------------------|--------------|-------------------------------------------------------------|----------------|-----------------------------|
|                |         |         |     |           |               | $\beta$                           | $\sigma_\beta$ | p-value                      | $\beta$                            | $\sigma_\beta$ | p-value                     |              | $\beta$                                                     | $\sigma_\beta$ | p-value                     |
| rs2470893      | t       | c       | 15  | 72806502  | CYP1A1/CYP1A2 | 0.0614                            | 0.011          | <b>2.39*10<sup>-08</sup></b> | 0.0986                             | 0.024          | <b>7.2*10<sup>-05</sup></b> | 0.0100       | 0.074                                                       | 0.017          | 8.7*10 <sup>-06</sup>       |
| rs2472297      | t       | c       | 15  | 72814933  | CYP1A1/CYP1A2 | 0.0671                            | 0.012          | <b>4.18*10<sup>-08</sup></b> | 0.1396                             | 0.032          | <b>1.9*10<sup>-05</sup></b> | 0.0008       | 0.092                                                       | 0.023          | 4.5*10 <sup>-05</sup>       |
| rs6495122      | a       | c       | 15  | 72912698  | CPLX3/ULK3    | -0.0551                           | 0.010          | 8.22*10 <sup>-08</sup>       | -0.0375                            | 0.016          | 0.020                       | 0.0110       | -0.057                                                      | 0.015          | 8.9*10 <sup>-05</sup>       |
| rs16868941     | a       | g       | 8   | 103121553 | NCALD         | 0.0648                            | 0.0124         | 1.55*10 <sup>-07</sup>       | 0.0018                             | 0.031          | 0.954                       | 0.9254       | 0.056                                                       | 0.011          | 8.2*10 <sup>-07</sup>       |
| rs382140       | a       | g       | 7   | 107569436 | LAMB4/ NRCAM  | 0.0729                            | 0.0143         | 3.34*10 <sup>-07</sup>       | 0.1351                             | 0.042          | <b>1.4*10<sup>-03</sup></b> | 0.7027       | 0.079                                                       | 0.013          | <b>3.8*10<sup>-09</sup></b> |
| rs9526558      | a       | g       | 13  | 48880513  | CAB39L        | 0.0595                            | 0.012          | 6.79*10 <sup>-07</sup>       | NA                                 | NA             | NA                          | 0.2290       | NA                                                          | NA             | NA                          |

**Supplementary Table 4. Additional evidence of association**

| MarkerName | Allele1 | Allele2 | DCGN    |          |          |          |          | NIJMEGEN |          |          |          |          | COMBINED |         |        |
|------------|---------|---------|---------|----------|----------|----------|----------|----------|----------|----------|----------|----------|----------|---------|--------|
|            |         |         | P-value | Beta     | SE       | Info     | Freq     | P-value  | Beta     | SE       | Info     | Freq     | P-value  | Beta    | SE     |
| rs16868941 | G       | A       | 0.80708 | 0.015905 | 0.066855 | 0.992196 | 0.751324 | 0.16577  | 0.091933 | 0.066743 | 0.989751 | 0.789612 | 0.25     | 0.0532  | 0.0465 |
| rs382140   | G       | A       | 0.46269 | 0.048663 | 0.068012 | 1        | 0.778832 | 0.26891  | 0.072604 | 0.066077 | 1        | 0.797333 | 0.19     | 0.0608  | 0.0468 |
| rs9526558  | G       | A       | 0.63512 | -0.03373 | 0.072968 | 0.996371 | 0.183748 | 0.55405  | -0.03846 | 0.065401 | 0.996549 | 0.216426 | 0.45     | -0.0363 | 0.0480 |

**Supplementary Table 5. eQTL analysis of the top hits in GWAS**

| ProbeID     | Pos    | SNP       | Allele | Effect | H2   | Lod   | Pvalue   | Chr | gene     |
|-------------|--------|-----------|--------|--------|------|-------|----------|-----|----------|
| 1557325_at  | 72.913 | rs6495122 | C      | 0.289  | 4.14 | 3.238 | 0.00011  | 15  | ---      |
| 209956_s_at | 72.807 | rs2470893 | G      | -0.335 | 4.62 | 3.299 | 1.00E-04 | 15  | CAMK2B   |
| 229426_at   | 72.807 | rs2470893 | G      | 0.346  | 4.93 | 3.224 | 0.00012  | 15  | COX5A    |
| 229426_at   | 72.913 | rs6495122 | C      | -0.351 | 6.11 | 4.708 | 3.20E-06 | 15  | COX5A    |
| 232016_at   | 72.913 | rs6495122 | C      | 0.275  | 3.74 | 3.007 | 2.00E-04 | 15  | KIAA1018 |
| 240756_at   | 72.913 | rs6495122 | C      | -0.282 | 3.94 | 3.197 | 0.00012  | 15  | ---      |

Supplementary Table 6. Pathway analysis of differentially expressed genes

| Pathway                             | observed | expected | over/under | P-value                     |
|-------------------------------------|----------|----------|------------|-----------------------------|
| Ubiquitin proteasome pathway        | 34       | 15.23    | +          | <b>2.2*10<sup>-05</sup></b> |
| p53 pathway                         | 47       | 24.58    | +          | <b>3.5*10<sup>-05</sup></b> |
| Parkinson disease                   | 43       | 21.75    | +          | <b>3.6*10<sup>-05</sup></b> |
| De novo purine biosynthesis         | 20       | 7.4      | +          | <b>9.1*10<sup>-05</sup></b> |
| Cell cycle                          | 15       | 4.79     | +          | <b>1.4*10<sup>-04</sup></b> |
| p53 pathway feedback loops 2        | 25       | 11.31    | +          | <b>2.9*10<sup>-04</sup></b> |
| Coenzyme A biosynthesis             | 7        | 1.31     | +          | 4.1*10 <sup>-04</sup>       |
| Apoptosis signaling pathway         | 46       | 26.75    | +          | 4.3*10 <sup>-04</sup>       |
| DNA replication                     | 12       | 4.57     | +          | 2.7*10 <sup>-03</sup>       |
| Cadherin signaling pathway          | 17       | 31.98    | -          | 2.7*10 <sup>-03</sup>       |
| Hedgehog signaling pathway          | 13       | 5.44     | +          | 4.0*10 <sup>-03</sup>       |
| Vitamin B6 metabolism               | 4        | 0.65     | +          | 4.5*10 <sup>-03</sup>       |
| Serine glycine biosynthesis         | 5        | 1.09     | +          | 5.2*10 <sup>-03</sup>       |
| Ras Pathway                         | 28       | 17.18    | +          | 9.9*10 <sup>-03</sup>       |
| Succinate to proprionate conversion | 3        | 0.44     | +          | 9.9*10 <sup>-03</sup>       |
| Pyridoxal phosphate salvage pathway | 3        | 0.44     | +          | 9.9*10 <sup>-03</sup>       |

Significant p-values in bold



## Supplementary Figure Legends

**Supplementary Figure 1.** Genome-wide association plot for coffee drinking. The vertical axis shows the negative logarithm of the association p-values and the horizontal axis shows the whole autosomal genome divided into 22 chromosomes. Each dot represents a SNP. The red dotted horizontal line depicts the genome-wide significance threshold p-value of  $5 \times 10^{-08}$ .

**Supplementary Figure 2.** Quantile-Quantile plot for Coffee drinking. The horizontal axis shows the negative logarithm of the expected p-values from a 1 d.f. chi-square distribution and the vertical axis shows the negative logarithm of the p-values from the observed chi-square distribution. Each black dot represents a SNP while the red line is the expected distribution.

**Supplementary Figure 3.** Regional association plot for 15q24 in the RS-II after adjusting for the two most significant hits in the region. The vertical axis shows the negative logarithm of the association p-values and the horizontal axis shows the position in mega bases. The purple diamond represents rs6495122, circles represent other SNPs in the region with different colours representing the extent of linkage disequilibrium of these SNPs with rs6495122. Genes in the region are shown below the horizontal axis.

**Supplementary Figure 4.** Regional association plot for chromosome 8 (rs16868941). The vertical axis shows the negative logarithm of the association p-values and the horizontal axis shows the position in mega bases. Each dot represents a SNP with the purple dot representing the top SNP (rs16868941) in the region while other colours representing the extent of linkage disequilibrium of other SNPs with top SNP. Genes in the region are shown below the horizontal axis.

**Supplementary Figure 5.** Regional association plot for chromosome 7 (rs382140). The vertical axis shows the negative logarithm of the association p-values and the horizontal axis shows the position in mega bases. Each dot represents a SNP with the purple dot representing the top SNP (rs382140) in the region while other colours representing the extent of linkage disequilibrium of other SNPs with top SNP. Genes in the region are shown below the horizontal axis.

**Supplementary Figure 6.** Regional association plot for chromosome 13 (rs95265580). The vertical axis shows the negative logarithm of the association p-values and the horizontal axis shows the position in mega bases. Each dot represents a SNP with the purple dot representing the top SNP (rs95265580) in the region while other colours representing the extent of linkage disequilibrium of other SNPs with top SNP. Genes in the region are shown below the horizontal axis.

Supplementary Figure 1

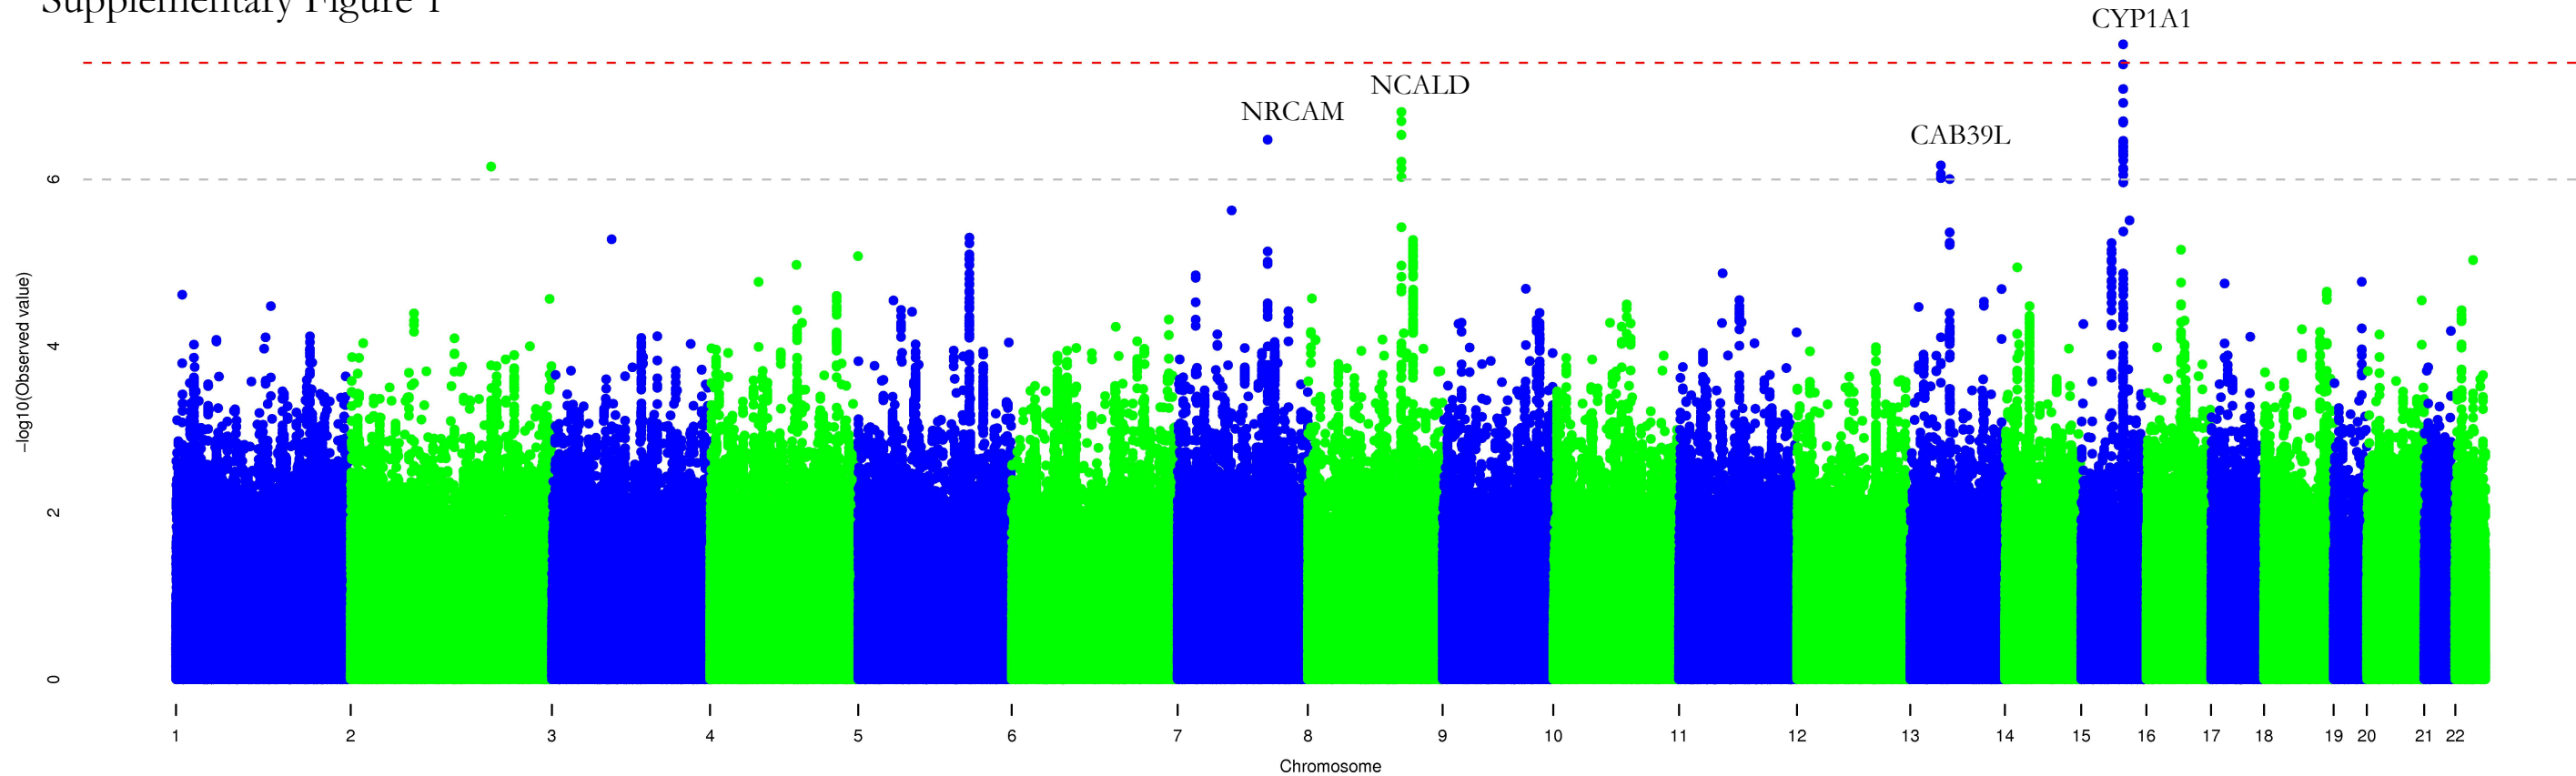

Supplementary Figure 2

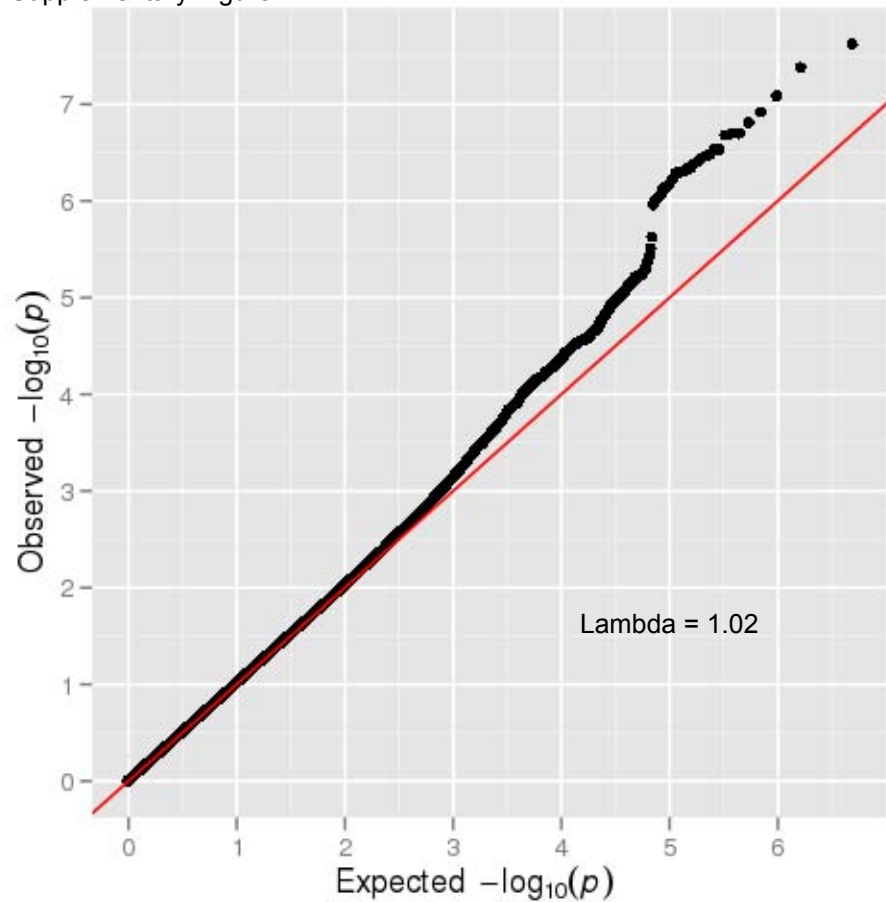

Plotted SNPs

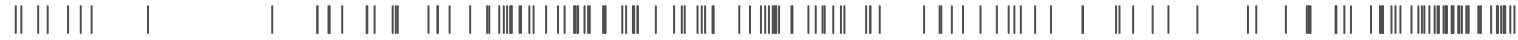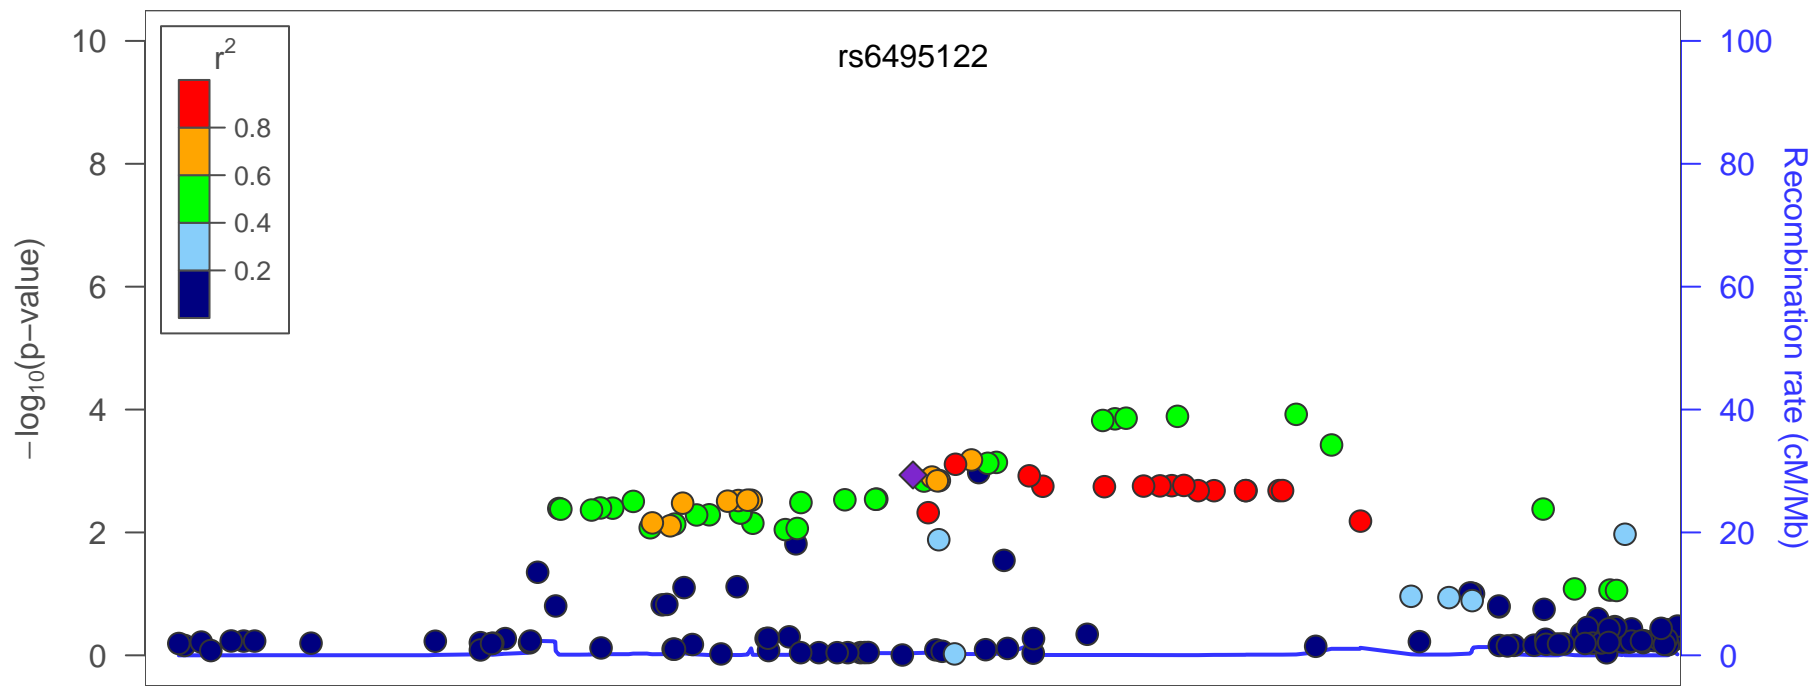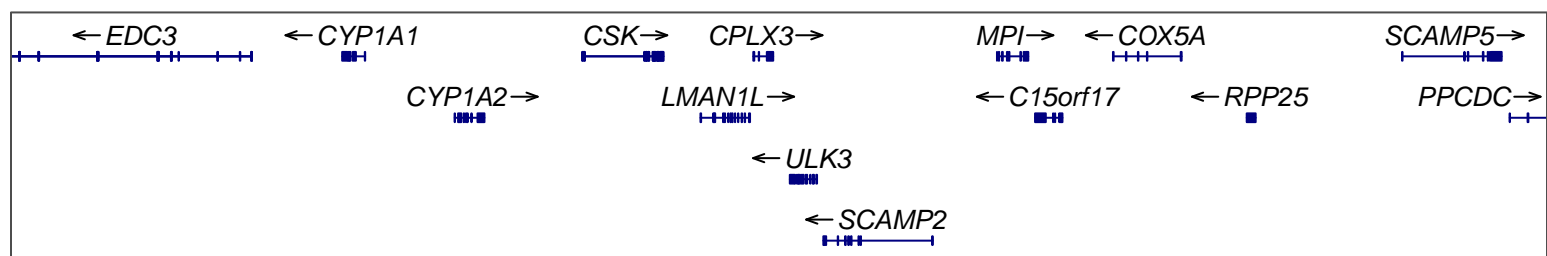

72.8 72.9 73 73.1

Position on chr15 (Mb)

Supplementary Figure 3

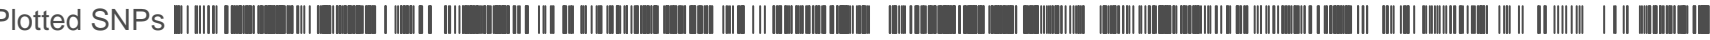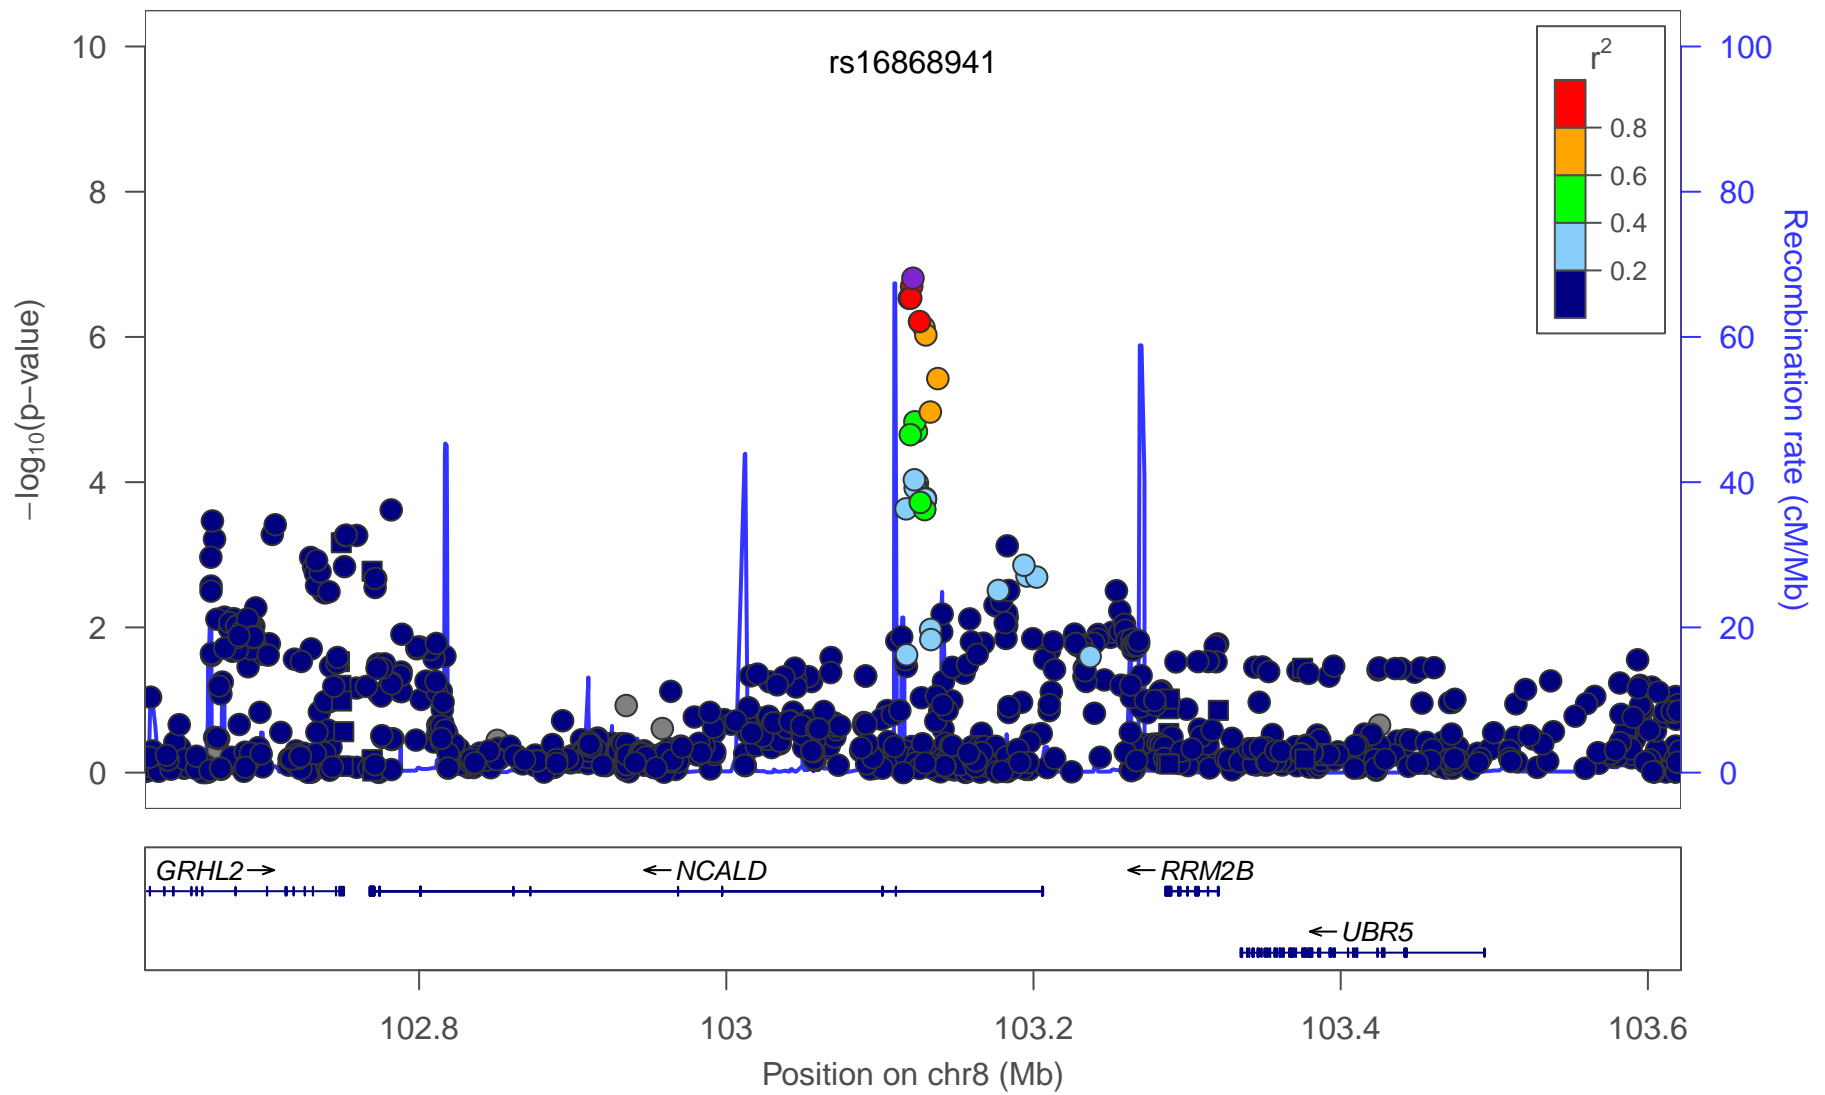

Supplementary Figure 4

Plotted SNPs | 

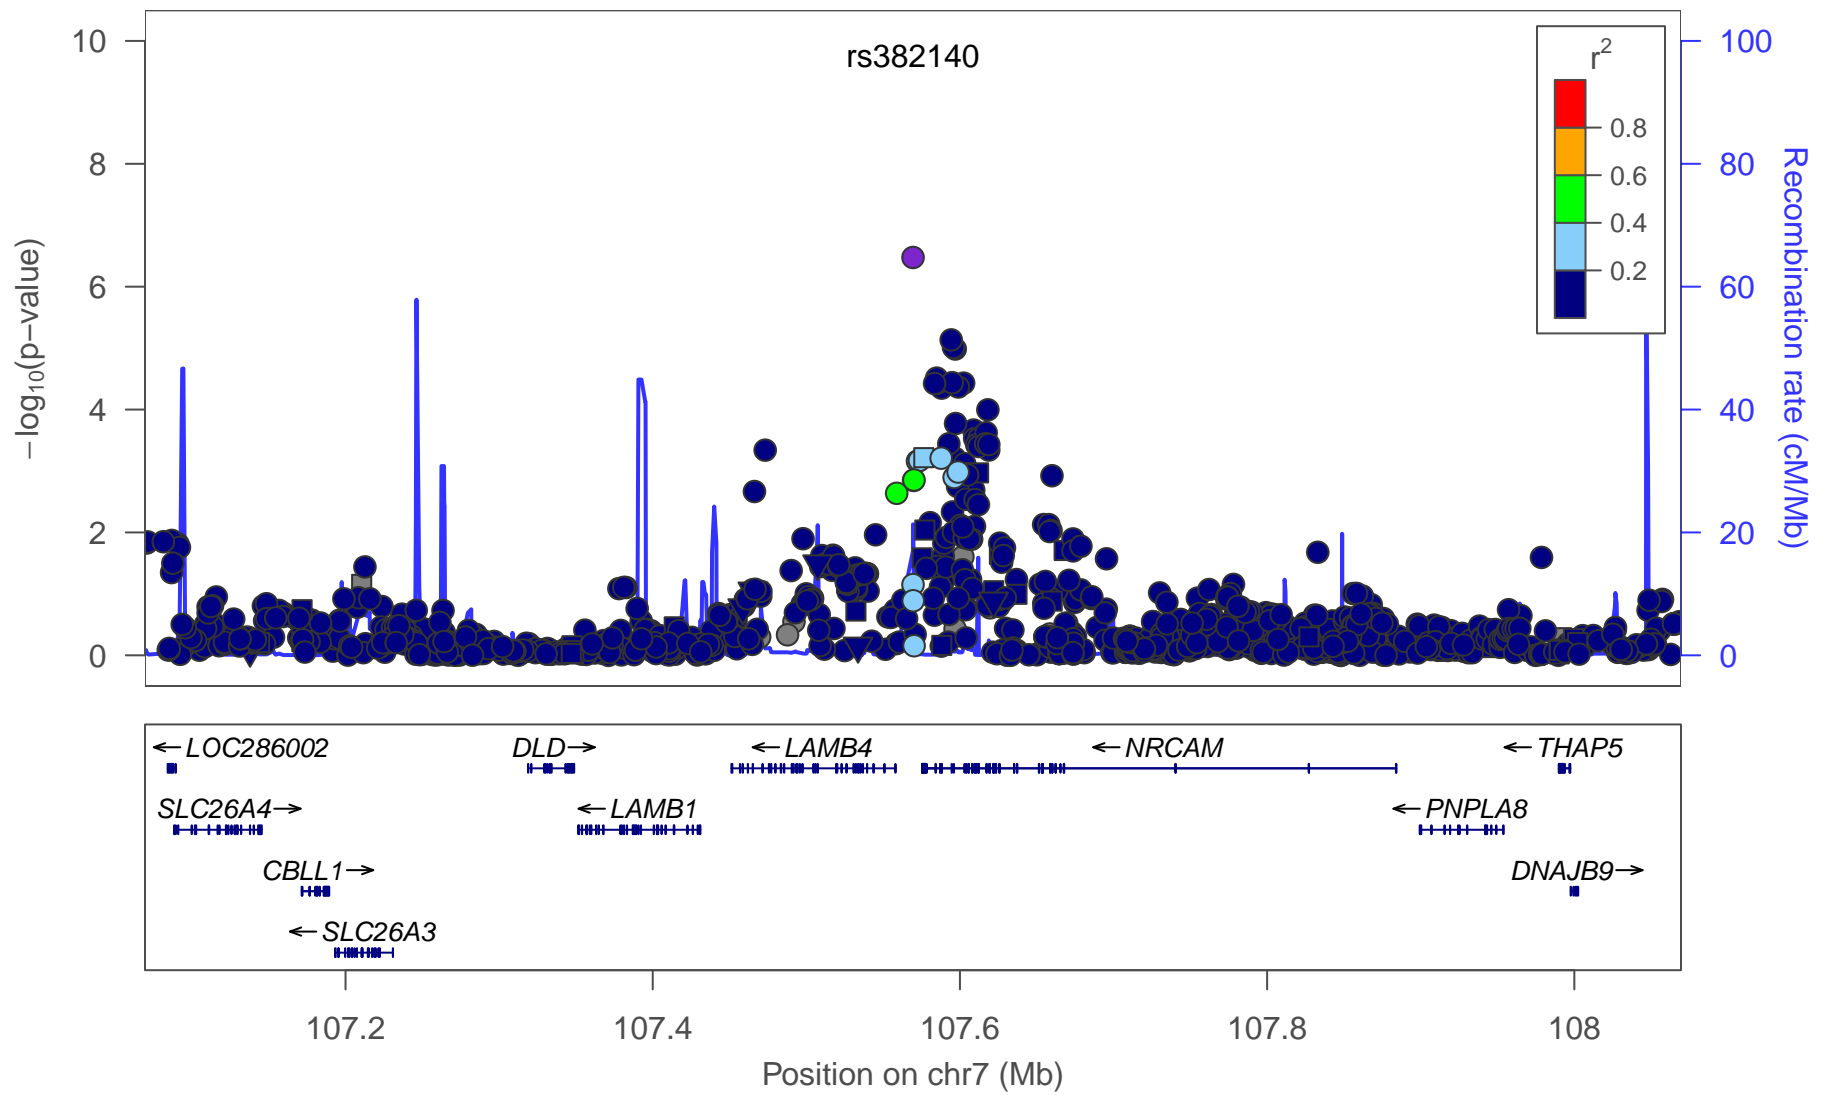

Supplementary Figure 5

Plotted SNPs

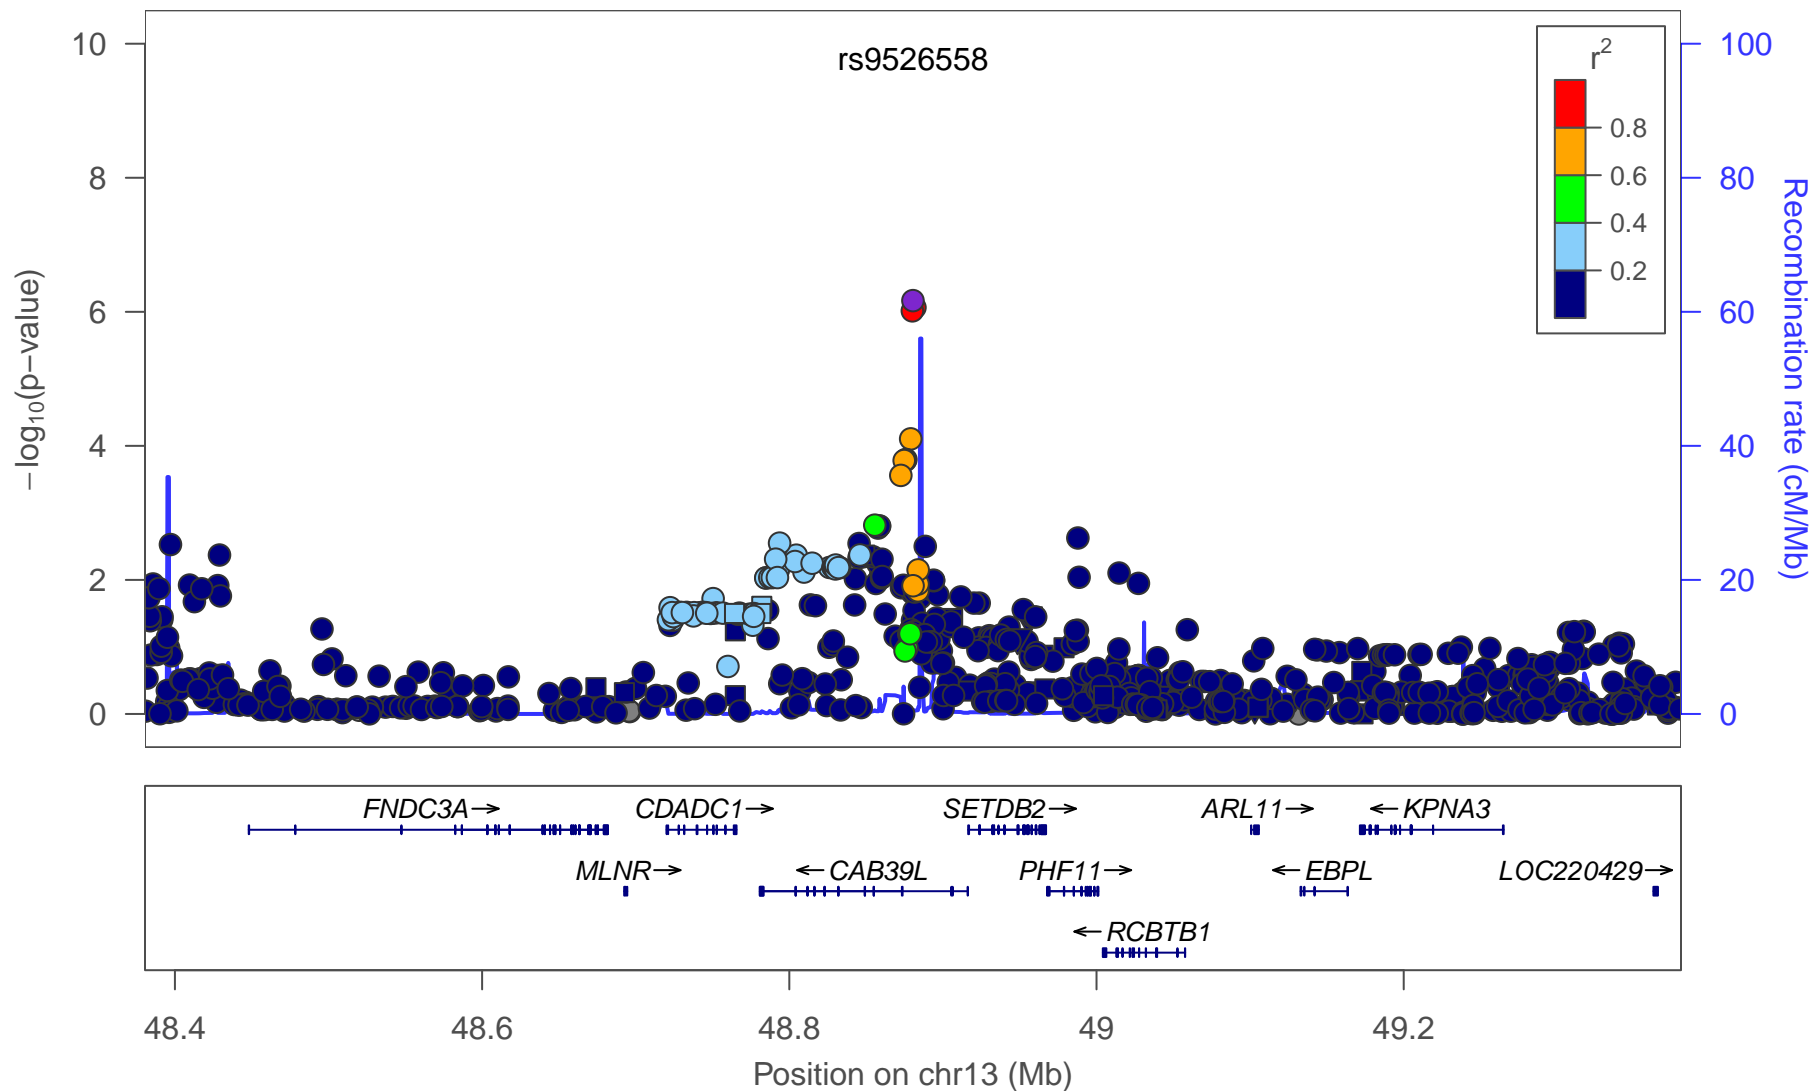

Supplement: 41380_2012_BFmp2011101_MOESM393_ESM.pdf [file 41380_2012_BFmp2011101_MOESM393_ESM.pdf]
